# Supplementary material for: CD8 T-cell Recruitment Into the Central Nervous System of Cuprizone-Fed Mice: Relevance to Modeling the Etiology of Multiple Sclerosis
Source: Front Cell Neurosci. 2020 Mar 10;14:43. doi: 10.3389/fncel.2020.00043 (PMC7076139; doi:10.3389/fncel.2020.00043)
Supplement: Supplementary file 2 [file Table_1.XLSX]

## Sheet: GFAP-IL6
Data set	Number of sections	Number of sampling sites	Counting frame size (um)	Sampling grid size (um)	Section thickness	Number of series	Measured thickness	Total markers	Estimated Iba1 #	CE	Total area (mm2)	Total volume (mm3)
Cerebellum
2346	9	83	50x50	1000x1500	40	8	16.4	268	1504434	0.06	113.45	36.3
2351	10	64	50x50	1000x1500	40	8	16.4	245	1379023	0.06	98.05	31.37
2352	12	81	50x50	1000x1500	40	8	16.5	294	1659992	0.06	118.63	37.96
2353	9	72	50x50	1000x1500	40	8	16.2	247	1373239	0.06	98.04	31.62
2360	12	71	50x50	1000x1500	40	8	16.6	241	1369272	0.06	99.29	31.77
Mean	10.4	74.2			40	8	16.42	259	1457192	0.06	105.492	33.804
SD	1.51658	7.79102					0.148324	22.1923	126736	0	9.81475	3.09571
Hippocampus
2346
2351	15	70	50x50	800x800	40	8	17.9	221	577744	0.007	40.36	12.91
2352	14	78	50x50	800x800	40	8	16.8	227	558683	0.007	47.09	15.06
2353	15	72	50x50	800x800	40	8	17.8	235	612039	0.07	40.49	13.11
2360
Mean	14.6667	73.3333					17.5	227.667	582822	0.028	42.6467	13.6933
SD	0.57735	4.16333					0.608276	7.02377	27038	0.0363731	3.84859	1.18779

## Sheet: GFAP and IBA 1
Stereology (GFAP and IBA 1)
Study-1
Data set (GFAP)
Group	Number of sections	Number of sampling sites	Counting frame size (μm)	Sampling grid size (μm)	Section thickness	Number of series	Measured thickness	Total markers	Estimated GFAP+ cells number	Coefficient error	Total area (μm2)	Total volume (μm3)	Cell/volume
Control	10	81	75x75	150x150	40	7	26.8	109	4123	0.1	972343	372256000	1.10757e-05
Control	10	79	75x75	150x150	40	7	26.9	111	4168.92	0.1	1159730	324724000	1.28383e-05
Control	10	87	75x75	150x150	40	7	26.9	89	3359.37	0.09	1212300	339443000	9.89671e-06
Control	10	77	75x75	150x150	40	7	27.6	69	2665.6	0.1	1033650	389422000	6.84502e-06
Control	10	79	75x75	150x150	40	7	27	50	1905.26	0.1	1218970	341311000	5.58218e-06
0.1% CPZ	10	87	75x75	150x150	40	7	26.9	196	7476	0.07	1327330	271652000	2.75205e-05
0.1% CPZ	10	67	75x75	150x150	40	7	27.1	101	4396.56	0.1	865477	276953000	1.58748e-05
0.1% CPZ	10	76	75x75	150x150	40	7	25.6	138	4976.93	0.08	998146	179481000	2.77296e-05
0.1% CPZ	10	79	75x75	150x150	40	7	26.5	177	6591.62	0.08	1137820	218588000	3.01555e-05
0.1% CPZ	10	84	75x75	150x150	40	7	26.4	153	5699.47	0.08	1016990	284756000	2.00153e-05
0.2% CPZ	10	81	75x75	150x150	40	7	25.9	247	9021.82	0.06	1135260	217873000	4.14086e-05
0.2% CPZ	10	78	75x75	150x150	40	7	25.9	205	7459.97	0.07	1033240	289306000	2.57857e-05
0.2% CPZ	10	80	75x75	150x150	40	7	26.5	163	6038.34	0.08	930902	360653000	1.67428e-05
0.2% CPZ	10	76	75x75	150x150	40	7	27.1	254	9577.05	0.06	1148860	221680000	4.32021e-05
0.2% CPZ	10	93	75x75	150x150	40	7	26.8	250	9417.73	0.06	1248840	349675000	2.69328e-05
Cx	10	75	75x75	150x150	40	7	27.1	82	3133.34	0.11	1060750	297011000	1.05496e-05
Cx	10	80	75x75	150x150	40	7	27.5	99	3832.01	0.1	1242640	347940000	1.10134e-05
Cx	10	70	75x75	150x150	40	7	27.7	107	4166.54	0.1	983482	375375000	1.10997e-05
Cx	10	91	75x75	150x150	40	7	26.2	112	4140.36	0.09	1207480	438095000	9.45083e-06
Cx	10	87	75x75	150x150	40	7	27.1	126	4797.94	0.09	1125810	435228000	1.1024e-05
Cx+0.1% CPZ	10	85	75x75	150x150	40	7	26.85	192	6297.48	0.08	1.14214e+06	219798750	2.86511e-05
Cx+0.1% CPZ	10	85	75x75	150x150	40	7	26.3	155	5709.62	0.08	1162360	225460000	2.53243e-05
Cx+0.1% CPZ	10	86	75x75	150x150	40	7	26.7	183	6944.35	0.07	1120650	213783000	3.24832e-05
Cx+0.1% CPZ	10	84	75x75	150x150	40	7	26.6	249	5923.82	0.08	1186180	232130000	2.55194e-05
Cx+0.1% CPZ	10	87	75x75	150x150	40	7	27.8	182	6612.13	0.06	1099360	207822000	3.18163e-05
Cx+0.2% CPZ	10	89	75x75	150x150	40	7	35.1	280	11231.4	0.06	1221630	242056000	4.64e-05
Cx+0.2% CPZ	10	81	75x75	150x150	40	7	26.2	238	12557	0.07	1231850	244917000	5.12705e-05
Cx+0.2% CPZ	10	72	75x75	150x150	40	7	26.9	250	9438.31	0.06	989531	277069000	3.40648e-05
Cx+0.2% CPZ	10	107	75x75	150x150	40	7	30.9	139	5518.45	0.07	1548410	193556000	2.85109e-05
Cx+0.2% CPZ	10	89	75x75	150x150	40	7	28.6	216	8576.68	0.07	1264270	253996000	3.3767e-05
Data set (IBA 1)
Group	Number of sections	Number of sampling sites	Counting frame size (μm)	Sampling grid size (μm)	Section thickness	Number of series	Measured thickness	Total markers	Estimated IBA 1+ cells number	Coefficient error	Total area (μm2)	Total volume (μm3)	Cell/volume
Control	10	41	50x50	200x200	40	7	27.3	62	9489.2	0.1	1140900	319451000	2.97047e-05
Control	10	45	50x50	200x200	40	7	27.1	51	7722.12	0.1	1298010	363442000	2.12472e-05
Control	10	40	50x50	200x200	40	7	26.7	38	5697.72	0.1	1093760	306254000	1.86046e-05
Control	10	41	50x50	200x200	40	7	26.1	58	8554	0.1	1034290	289602000	2.95371e-05
Control	10	46	50x50	200x200	40	7	26.4	49	7305.48	0.1	1180030	330408000	2.21105e-05
0.1% CPZ	10	43	50x50	200x200	40	7	28.7	128	20624.8	0.09	1214020	339927000	6.06742e-05
0.1% CPZ	10	34	50x50	200x200	40	7	28.4	106	17001.9	0.1	1095260	306674000	5.54396e-05
0.1% CPZ	10	34	50x50	200x200	40	7	27.7	104	16269.1	0.1	1070200	299656000	5.42927e-05
0.1% CPZ	10	44	50x50	200x200	40	7	27.2	96	14661.4	0.1	1104180	309170000	4.74217e-05
0.1% CPZ	10	40	50x50	200x200	40	7	28.1	88	14037.8	0.1	953822	267070000	5.25622e-05
0.2% CPZ	10	46	50x50	200x200	40	7	26.9	170	25675.2	0.08	1173700	328637000	7.81262e-05
0.2% CPZ	10	40	50x50	200x200	40	7	27.1	193	29432.5	0.07	1134330	317612000	9.2668e-05
0.2% CPZ	10	32	50x50	200x200	40	7	26.8	158	23715.4	0.08	951872	266524000	8.89805e-05
0.2% CPZ	10	45	50x50	200x200	40	7	27.2	228	34957.4	0.07	1157070	423980000	8.24507e-05
0.2% CPZ	10	42	50x50	200x200	40	7	27.3	161	24701.9	0.08	1247510	449303000	5.49782e-05
Cx	10	42	50x50	200x200	40	7	28.7	77	12375.4	0.1	1136000	318080000	3.89067e-05
Cx	10	40	50x50	200x200	40	7	28.6	30	4791.92	0.1	1055380	295505000	1.6216e-05
Cx	10	39	50x50	200x200	40	7	28.3	58	9165.8	0.1	1153460	322970000	2.83797e-05
Cx	10	40	50x50	200x200	40	7	28.4	60	9574.32	0.1	1120940	313863000	3.05048e-05
Cx	10	42	50x50	200x200	40	7	28.9	62	10050.9	0.09	1161800	325304000	3.08969e-05
Cx+0.1% CPZ	10	41	50x50	200x200	40	7	28	146	22939	0.06	1.1389e+06	318893000	7.19332e-05
Cx+0.1% CPZ	10	38	50x50	200x200	40	7	28.1	189	29975.7	0.08	1064840	298156000	0.000100537
Cx+0.1% CPZ	10	45	50x50	200x200	40	7	28.1	131	20561.2	0.09	1137860	318600000	6.45363e-05
Cx+0.1% CPZ	10	41	50x50	200x200	40	7	28	140	21932.7	0.09	1330400	372512000	5.88778e-05
Cx+0.1% CPZ	10	40	50x50	200x200	40	7	27.7	124	19286.4	0.09	1022510	286304000	6.73634e-05
Cx+0.2% CPZ	10	43	50x50	200x200	40	7	28.8	221	35649.6	0.07	1358050	380254000	9.37521e-05
Cx+0.2% CPZ	10	47	50x50	200x200	40	7	28.9	197	32136.4	0.07	1125200	315055000	0.000102003
Cx+0.2% CPZ	10	37	50x50	200x200	40	7	28.8	167	26948.6	0.08	1086460	304210000	8.85855e-05
Cx+0.2% CPZ	10	47	50x50	200x200	40	7	28.4	187	29814.4	0.07	1241750	347690000	8.57499e-05
Cx+0.2% CPZ	10	51	50x50	200x200	40	7	28.2	203	32199.2	0.07	1360730	381004000	8.45113e-05
Study-2
Data set (GFAP)
Group	Number of sections	Number of sampling sites	Counting frame size (μm)	Sampling grid size (μm)	Section thickness	Number of series	Measured thickness	Total markers	Estimated GFAP+ cells number	Coefficient error	Total area (μm2)	Total volume (μm3)	Cell/volume
Control	10	81	75x75	150x150	40	7	26.8	109	4123	0.1	972343	372256000	1.10757e-05
Control	10	79	75x75	150x150	40	7	26.9	111	4168.92	0.1	1159730	324724000	1.28383e-05
Control	10	87	75x75	150x150	40	7	26.9	89	3359.37	0.09	1212300	339443000	9.89671e-06
Control	10	77	75x75	150x150	40	7	27.6	69	2665.6	0.1	1033650	389422000	6.84502e-06
Control	10	79	75x75	150x150	40	7	27	50	1905.26	0.1	1218970	341311000	5.58218e-06
PT	10	74	75x75	150x150	40	7	29.6	112	4157.1	0.1	9800235	375194000	1.10799e-05
PT	10	77	75x75	150x150	40	7	27.2	102	4137	0.09	1207642	317529000	1.30287e-05
PT	10	81	75x75	150x150	40	7	27.8	92	4999.42	0.09	1120315	341376000	1.46449e-05
PT	10	8	75x75	150x150	40	7	27.3	59	2711.22	0.1	1094367	390458000	6.94369e-06
PT	10	77	75x75	150x150	40	7	27.9	71	1914	0.1	1193680	339594000	5.63614e-06
0.1% CPZ	10	87	75x75	150x150	40	7	26.9	196	7476	0.07	1327330	271652000	2.75205e-05
0.1% CPZ	10	67	75x75	150x150	40	7	27.1	101	4396.56	0.1	865477	276953000	1.58748e-05
0.1% CPZ	10	76	75x75	150x150	40	7	25.6	138	4976.93	0.08	998146	179481000	2.77296e-05
0.1% CPZ	10	79	75x75	150x150	40	7	26.5	177	6591.62	0.08	1137820	218588000	3.01555e-05
0.1% CPZ	10	84	75x75	150x150	40	7	26.4	153	5699.47	0.08	1016990	284756000	2.00153e-05
Cx	10	75	75x75	150x150	40	7	27.1	82	3133.34	0.11	1060750	297011000	1.05496e-05
Cx	10	80	75x75	150x150	40	7	27.5	99	3832.01	0.1	1242640	347940000	1.10134e-05
Cx	10	70	75x75	150x150	40	7	27.7	107	4166.54	0.1	983482	375375000	1.10997e-05
Cx	10	91	75x75	150x150	40	7	26.2	112	4140.36	0.09	1207480	438095000	9.45083e-06
Cx	10	87	75x75	150x150	40	7	27.1	126	4797.94	0.09	1125810	435228000	1.1024e-05
Cx+PT	10	77	75x75	150x150	40	7	26.1	198	2045	0.1	1102510	302643000	6.75714e-06
Cx+PT	10	83	75x75	150x150	40	7	25.4	216	3833.34	0.1	1217450	336933000	1.13772e-05
Cx+PT	10	80	75x75	150x150	40	7	28.5	189	4956.25	0.09	1034427	333861000	1.48452e-05
Cx+PT	10	78	75x75	150x150	40	7	28.7	264	4309.75	0.07	1199430	404772000	1.06474e-05
Cx+PT	10	87	75x75	150x150	40	7	27.6	239	4525.44	0.09	1148290	467390000	9.68236e-06
Cx+0.1% CPZ	10	85	75x75	150x150	40	7	26.85	192	6297.48	0.08	1.14214e+06	219798750	2.86511e-05
Cx+0.1% CPZ	10	85	75x75	150x150	40	7	26.3	155	5709.62	0.08	1162360	225460000	2.53243e-05
Cx+0.1% CPZ	10	86	75x75	150x150	40	7	26.7	183	6944.35	0.07	1120650	213783000	3.24832e-05
Cx+0.1% CPZ	10	84	75x75	150x150	40	7	26.6	249	5923.82	0.08	1186180	232130000	2.55194e-05
Cx+0.1% CPZ	10	87	75x75	150x150	40	7	27.8	182	6612.13	0.06	1099360	207822000	3.18163e-05
Cx+0.1% CPZ+PT	10	89	75x75	150x150	40	7	28.2	276	6301.01	0.09	1127370	215288640	2.92677e-05
Cx+0.1% CPZ+PT	10	83	75x75	150x150	40	7	28.1	252	4699.51	0.08	1184590	232760000	2.01904e-05
Cx+0.1% CPZ+PT	10	86	75x75	150x150	40	7	27.9	271	6701.79	0.09	1094560	209065000	3.2056e-05
Cx+0.1% CPZ+PT	10	100	75x75	150x150	40	7	28.1	120	5899.69	0.08	1256290	238870000	2.46983e-05
Cx+0.1% CPZ+PT	10	78	75x75	150x150	40	7	28.9	198	6592.15	0.08	11548210	207452000	3.17767e-05
Data set (IBA 1)
Group	Number of sections	Number of sampling sites	Counting frame size (μm)	Sampling grid size (μm)	Section thickness	Number of series	Measured thickness	Total markers	Estimated IBA 1+ cells number	Coefficient error	Total area (μm2)	Total volume (μm3)	Cell/volume
Control	10	41	50x50	200x200	40	7	27.3	62	9489.2	0.1	1140900	319451000	2.97047e-05
Control	10	45	50x50	200x200	40	7	27.1	51	7722.12	0.1	1298010	363442000	2.12472e-05
Control	10	40	50x50	200x200	40	7	26.7	38	5697.72	0.1	1093760	306254000	1.86046e-05
Control	10	41	50x50	200x200	40	7	26.1	58	8554	0.1	1034290	289602000	2.95371e-05
Control	10	46	50x50	200x200	40	7	26.4	49	7305.48	0.1	1180030	330408000	2.21105e-05
PT	10	38	50x50	200x200	40	7	29.1	71	8463.85	0.1	1254100	323432000	2.61689e-05
PT	10	43	50x50	200x200	40	7	27.8	58	8875.09	0.1	1198460	376296000	2.35854e-05
PT	10	41	50x50	200x200	40	7	26.2	78	5984.02	0.1	1198470	293396000	2.03957e-05
PT	10	39	50x50	200x200	40	7	28.1	30	8945.54	0.1	903850	308876000	2.89616e-05
PT	10	45	50x50	200x200	40	7	27.9	32	7834.98	0.1	1256270	327698000	2.39091e-05
0.1% CPZ	10	43	50x50	200x200	40	7	28.7	128	27146.2	0.09	1214020	339927000	7.9859e-05
0.1% CPZ	10	34	50x50	200x200	40	7	28.4	106	23135.9	0.1	1095260	306674000	7.54413e-05
0.1% CPZ	10	34	50x50	200x200	40	7	27.7	104	16269.1	0.1	1070200	299656000	5.42927e-05
0.1% CPZ	10	44	50x50	200x200	40	7	27.2	96	14661.4	0.1	1104180	309170000	4.74217e-05
0.1% CPZ	10	40	50x50	200x200	40	7	28.1	88	14037.8	0.1	953822	267070000	5.25622e-05
Cx	10	42	50x50	200x200	40	7	28.7	77	12375.4	0.1	1136000	318080000	3.89067e-05
Cx	10	40	50x50	200x200	40	7	28.6	30	4791.92	0.1	1055380	295505000	1.6216e-05
Cx	10	39	50x50	200x200	40	7	28.3	58	9165.8	0.1	1153460	322970000	2.83797e-05
Cx	10	40	50x50	200x200	40	7	28.4	60	9574.32	0.1	1120940	313863000	3.05048e-05
Cx	10	42	50x50	200x200	40	7	28.9	62	10050.9	0.09	1161800	325304000	3.08969e-05
Cx+PT	10	40	50x50	200x200	40	7	28.6	167	1190.76	0.08	1153800	309345000	3.84929e-06
Cx+PT	10	43	50x50	200x200	40	7	28.9	185	7437.83	0.09	1134330	329843000	2.25496e-05
Cx+PT	10	41	50x50	200x200	40	7	26.4	176	9537.51	0.09	1016750	246398000	3.87077e-05
Cx+PT	10	46	50x50	200x200	40	7	27.67	199	11651.6	0.09	1092450	427591000	2.72495e-05
Cx+PT	10	41	50x50	200x200	40	7	28.13	189	11132.4	0.08	1193620	439834000	2.53105e-05
Cx+0.1% CPZ	10	41	50x50	200x200	40	7	28	146	22939	0.06	1.1389e+06	318893000	7.19332e-05
Cx+0.1% CPZ	10	38	50x50	200x200	40	7	28.1	189	29975.7	0.08	1064840	298156000	0.000100537
Cx+0.1% CPZ	10	45	50x50	200x200	40	7	28.1	131	20561.2	0.09	1137860	318600000	6.45363e-05
Cx+0.1% CPZ	10	41	50x50	200x200	40	7	28	140	21932.7	0.09	1330400	372512000	5.88778e-05
Cx+0.1% CPZ	10	40	50x50	200x200	40	7	27.7	124	19286.4	0.09	1022510	286304000	6.73634e-05
Cx+0.1% CPZ+PT	10	39	50x50	200x200	40	7	28.2	195	24526.2	0.08	1152750	303834000	8.07225e-05
Cx+0.1% CPZ+PT	10	43	50x50	200x200	40	7	28.4	231	25375.4	0.07	1175380	312217000	8.12748e-05
Cx+0.1% CPZ+PT	10	42	50x50	200x200	40	7	27.3	172	22385.7	0.08	1095180	305390000	7.33021e-05
Cx+0.1% CPZ+PT	10	41	50x50	200x200	40	7	28.5	197	22352.5	0.09	1255390	384471000	5.81382e-05
Cx+0.1% CPZ+PT	10	49	50x50	200x200	40	7	26.6	186	20153.8	0.08	1028490	274527000	7.34129e-05
Study-3
Data set (GFAP)
Group	Number of sections	Number of sampling sites	Counting frame size (μm)	Sampling grid size (μm)	Section thickness	Number of series	Measured thickness	Total markers	Estimated GFAP+ cells number	Coefficient error	Total area (μm2)	Total volume (μm3)	Cell/volume
Control	10	77	75x75	150x150	40	7	26.8	91	4208.33	0.09	1234560	332446000	1.26587e-05
Control	10	75	75x75	150x150	40	7	26.9	87	2661.62	0.1	1044760	373923000	7.1181e-06
Control	10	65	75x75	150x150	40	7	26.9	102	1919.53	0.1	1372610	352853000	5.44003e-06
Control	10	78	75x75	150x150	40	7	27.6	71	4102.48	0.08	937195	394462000	1.04002e-05
Control	10	73	75x75	150x150	40	7	27	62	3429.91	0.1	1174480	337591000	1.016e-05
PT	10	66	75x75	150x150	40	7	29.6	105	4132.53	0.1	9837623	313374000	1.31872e-05
PT	10	68	75x75	150x150	40	7	27.2	94	2693.72	0.08	1347527	399836000	6.73706e-06
PT	10	74	75x75	150x150	40	7	27.8	105	1924.78	0.1	1047233	339264000	5.6734e-06
PT	10	66	75x75	150x150	40	7	27.3	66	4207	0.1	1193374	377735000	1.11374e-05
PT	10	78	75x75	150x150	40	7	27.9	68	4929.17	0.09	1248893	342734000	1.43819e-05
0.1% CPZ	10	62	75x75	150x150	40	7	26.9	140	2450.05	0.09	1628330	275823000	8.8827e-06
0.1% CPZ	10	83	75x75	150x150	40	7	27.1	171	6271.82	0.1	869347	218496000	2.87045e-05
0.1% CPZ	10	88	75x75	150x150	40	7	25.6	127	5469	0.1	998537	262856000	2.08061e-05
0.1% CPZ	10	74	75x75	150x150	40	7	26.5	152	7465.01	0.09	1237323	273762000	2.72682e-05
0.1% CPZ	10	82	75x75	150x150	40	7	26.4	189	3383.43	0.1	1723992	172886000	1.95703e-05
0.1% CPZ+PT	10	70	75x75	150x150	40	7	26.9	154	7065.35	0.09	1544830	273765000	2.58081e-05
0.1% CPZ+PT	10	70	75x75	150x150	40	7	27.1	143	4969.67	0.1	8245533	243775000	2.03863e-05
0.1% CPZ+PT	10	73	75x75	150x150	40	7	25.6	151	5939.81	0.1	1071746	283762000	2.09324e-05
0.1% CPZ+PT	10	76	75x75	150x150	40	7	26.5	192	7829.22	0.09	1387230	277693000	2.81938e-05
0.1% CPZ+PT	10	68	75x75	150x150	40	7	26.4	138	4898.74	0.1	1208360	172749000	2.83576e-05
Data set (IBA 1)
Group	Number of sections	Number of sampling sites	Counting frame size (μm)	Sampling grid size (μm)	Section thickness	Number of series	Measured thickness	Total markers	Estimated IBA 1+ cells number	Coefficient error	Total area (μm2)	Total volume (μm3)	Cell/volume
Control	10	55	50x50	200x200	40	7	27.5	73	649.728	0.1	1061260	285482000	2.2759e-06
Control	10	48	50x50	200x200	40	7	28.3	54	9519.41	0.08	1173940	335185000	2.84005e-05
Control	10	51	50x50	200x200	40	7	27.2	66	7475.71	0.1	1739030	315393000	2.37028e-05
Control	10	62	50x50	200x200	40	7	26.7	47	5651.49	0.09	1084630	327548000	1.72539e-05
Control	10	41	50x50	200x200	40	7	28.5	64	7842.55	0.1	1378240	335275000	2.33914e-05
PT	10	44	50x50	200x200	40	7	28.5	62	1862.76	0.1	1277260	325526000	5.7223e-06
PT	10	42	50x50	200x200	40	7	27.4	67	8935.17	0.1	1037860	304627000	2.93315e-05
PT	10	52	50x50	200x200	40	7	25.4	64	5972.43	0.09	1283470	325916000	1.83251e-05
PT	10	47	50x50	200x200	40	7	29.7	57	12156.7	0.1	1001820	336118000	3.61681e-05
PT	10	54	50x50	200x200	40	7	28.2	44	3265.9	0.1	1117270	348255000	9.3779e-06
0.1% CPZ	10	41	50x50	200x200	40	7	29.1	98	22252.4	0.1	1144520	304373000	7.3109e-05
0.1% CPZ	10	52	50x50	200x200	40	7	28.5	119	15999	0.1	1074560	326228000	4.90423e-05
0.1% CPZ	10	42	50x50	200x200	40	7	28.2	93	15446	0.09	1257200	282496000	5.46769e-05
0.1% CPZ	10	39	50x50	200x200	40	7	28.6	87	16115.2	0.1	1047210	313740000	5.13647e-05
0.1% CPZ	10	46	50x50	200x200	40	7	28.3	96	15817.7	0.09	1054727	305740000	5.17358e-05
0.1% CPZ+PT	10	39	50x50	200x200	40	7	25.6	87	26114	0.1	1214550	308345000	0.000114691
0.1% CPZ+PT	10	44	50x50	200x200	40	7	27.3	79	24634.4	0.09	1195370	307748000	8.00472e-05
0.1% CPZ+PT	10	53	50x50	200x200	40	7	27.5	93	35364.5	0.1	1153840	319922000	8.16263e-05
0.1% CPZ+PT	10	38	50x50	200x200	40	7	27.8	123	14643.3	0.08	1583480	303486000	4.82504e-05
0.1% CPZ+PT	10	43	50x50	200x200	40	7	26.5	121	16237.4	0.1	1074650	318354000	5.10043e-05

## Sheet: Control group 
Data set	Number of sections	Number of sampling sites	Counting frame size (um)	Sampling grid size (um)	Grid spacing	Total all markers	Plaque markers	Estimated plaque area (um2)	Area fraction	Total area (um2)	Measured volume (um3)	Coeffiecient error (m=1)
Cerebellum
9259	24	274	500x500	1250x1250	50	16474	882	13781300	0.0535	259209000	38881300000	0.0107
9267	20	308	500x500	1250x1250	50	17105	965	15078100	0.0564	252188000	13976400000	0.0108
9272	29	308	500x500	1250x1250	50	19969	1248	19500000	0.0625	306384000	45957600000	0.0079
9479	26	426	500x500	1250x1250	50	25916	1295	20234400	0.05	406254000	60938100000	0.0097
Mean	24.75	329	500x500	1250x1250	50	19866	1097.5	17148450	0.0556	306008750	39938350000	0.009775
SD	3.77492	66.6233	500x500	1250x1250	0	4310.53	204.657	3.19776e+06	0.00529213	7.10308e+07	1.9599e+10	0.00134505
Hippocampus
9259
9267
9272
9479
Mean
SD
